# Supplementary material for: Predictive Risk Mapping of Schistosomiasis in Madagascar Using Ecological Niche Modeling and Precision Mapping
Source: MDPI journal article supplement (doi:10.3390/tropicalmed7020015), 2022-01-19
Supplement: s1 [file s1]

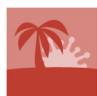

## Supplementary Materials

Article

# Predictive Risk Mapping of Schistosomiasis in Madagascar Using Ecological Niche Modeling and Precision Mapping

Mark A. Deka

Centers for Disease Control and Prevention (CDC), 4770 Buford Hwy NE, Atlanta, GA 30341, USA;  
pmu5@cdc.gov

### Table of Contents

*Image S1: Environmental variable response plots*

*Table S1: Occurrence locations (n = 231)*

**Image S1:** Environmental variable response plots.

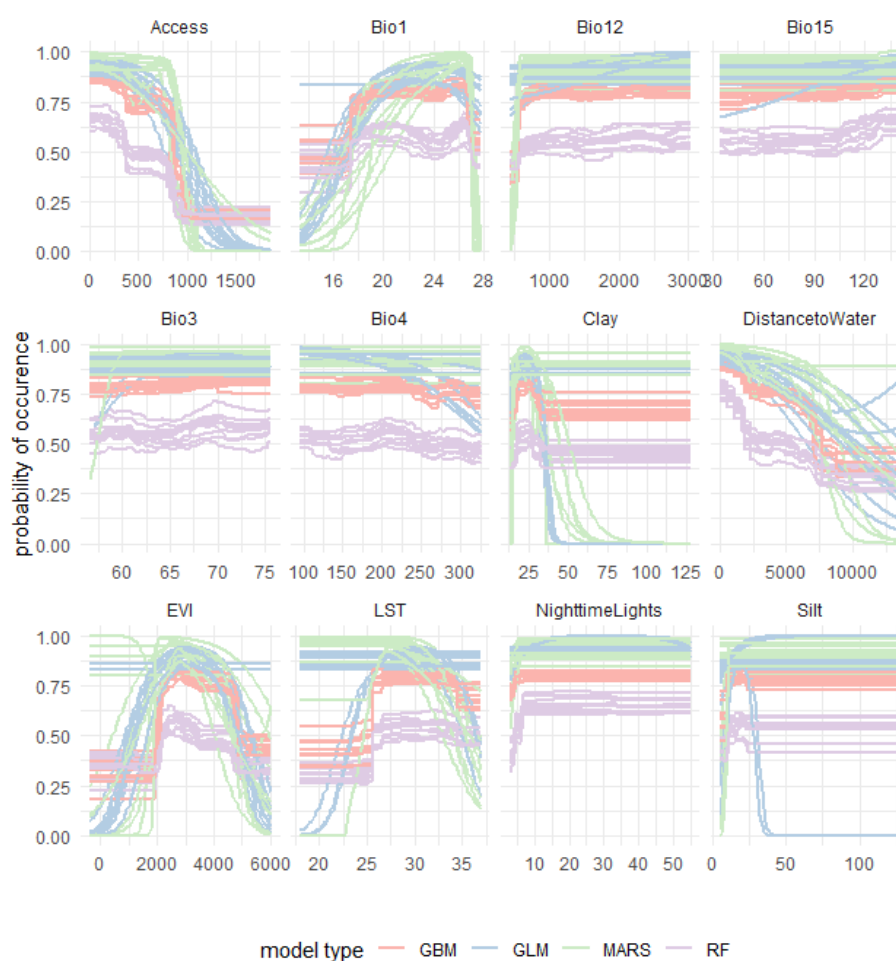

Table S1. Occurrence locations (n = 231).

| Source                                                                                                                                     | Year | Species                       | Longitude     | Latitude   |
|--------------------------------------------------------------------------------------------------------------------------------------------|------|-------------------------------|---------------|------------|
| GBIF.org (11 November 2021) GBIF Occurrence Download <a href="https://doi.org/10.15468/dl.rmpbet">https://doi.org/10.15468/dl.rmpbet</a> . | NA   | <i>Bulinus forskalii</i>      | 48.25899      | -13.31421  |
| GBIF.org (11 November 2021) GBIF Occurrence Download <a href="https://doi.org/10.15468/dl.rmpbet">https://doi.org/10.15468/dl.rmpbet</a> . | NA   | <i>Bulinus forskalii</i>      | 48.25899      | -13.31421  |
| GBIF.org (11 November 2021) GBIF Occurrence Download <a href="https://doi.org/10.15468/dl.rmpbet">https://doi.org/10.15468/dl.rmpbet</a> . | 1921 | <i>Bulinus forskalii</i>      | 48.25899      | -13.31421  |
| GBIF.org (11 November 2021) GBIF Occurrence Download <a href="https://doi.org/10.15468/dl.rmpbet">https://doi.org/10.15468/dl.rmpbet</a> . | NA   | <i>Bulinus forskalii</i>      | 48.25899      | -13.31421  |
| GBIF.org (11 November 2021) GBIF Occurrence Download <a href="https://doi.org/10.15468/dl.rmpbet">https://doi.org/10.15468/dl.rmpbet</a> . | NA   | <i>Bulinus forskalii</i>      | 48.25899      | -13.31421  |
| GBIF.org (11 November 2021) GBIF Occurrence Download <a href="https://doi.org/10.15468/dl.rmpbet">https://doi.org/10.15468/dl.rmpbet</a> . | 1921 | <i>Bulinus forskalii</i>      | 48.25899      | -13.31421  |
| GBIF.org (11 November 2021) GBIF Occurrence Download <a href="https://doi.org/10.15468/dl.rmpbet">https://doi.org/10.15468/dl.rmpbet</a> . | 1998 | <i>Bulinus liratus</i>        | 48.75384<br>7 | -14.5473   |
| GBIF.org (11 November 2021) GBIF Occurrence Download <a href="https://doi.org/10.15468/dl.rmpbet">https://doi.org/10.15468/dl.rmpbet</a> . | 1998 | <i>Bulinus obtusispira</i>    | 49.04363<br>2 | -13.193417 |
| GBIF.org (11 November 2021) GBIF Occurrence Download <a href="https://doi.org/10.15468/dl.rmpbet">https://doi.org/10.15468/dl.rmpbet</a> . | 1997 | <i>Bulinus bavayi</i>         | 44.80220<br>3 | -23.560516 |
| GBIF.org (11 November 2021) GBIF Occurrence Download <a href="https://doi.org/10.15468/dl.rmpbet">https://doi.org/10.15468/dl.rmpbet</a> . | 1998 | <i>Bulinus truncatus</i>      | 44.713        | -24.665417 |
| GBIF.org (11 November 2021) GBIF Occurrence Download <a href="https://doi.org/10.15468/dl.rmpbet">https://doi.org/10.15468/dl.rmpbet</a> . | 1997 | <i>Bulinus truncatus</i>      | 48.66018<br>3 | -14.66555  |
| GBIF.org (11 November 2021) GBIF Occurrence Download <a href="https://doi.org/10.15468/dl.rmpbet">https://doi.org/10.15468/dl.rmpbet</a> . | 1997 | <i>Bulinus liratus</i>        | 44.80220<br>3 | -23.560516 |
| GBIF.org (11 November 2021) GBIF Occurrence Download <a href="https://doi.org/10.15468/dl.rmpbet">https://doi.org/10.15468/dl.rmpbet</a> . | 2008 | <i>Bulinus africanus</i>      | 47.33252      | -23.20214  |
| GBIF.org (11 November 2021) GBIF Occurrence Download <a href="https://doi.org/10.15468/dl.rmpbet">https://doi.org/10.15468/dl.rmpbet</a> . | 1997 | <i>Bulinus liratus</i>        | 44.52076<br>7 | -23.4906   |
| GBIF.org (11 November 2021) GBIF Occurrence Download <a href="https://doi.org/10.15468/dl.rmpbet">https://doi.org/10.15468/dl.rmpbet</a> . | 1997 | <i>Bulinus truncatus</i>      | 44.52076<br>7 | -23.4906   |
| GBIF.org (11 November 2021) GBIF Occurrence Download <a href="https://doi.org/10.15468/dl.rmpbet">https://doi.org/10.15468/dl.rmpbet</a> . | 2008 | <i>Bulinus truncatus</i>      | 45.66405      | -24.2064   |
| GBIF.org (11 November 2021) GBIF Occurrence Download <a href="https://doi.org/10.15468/dl.ntsbnv">https://doi.org/10.15468/dl.ntsbnv</a> . | NA   | <i>Biomphalaria pfeifferi</i> | 47            | -20        |
| GBIF.org (11 November 2021) GBIF Occurrence Download <a href="https://doi.org/10.15468/dl.ntsbnv">https://doi.org/10.15468/dl.ntsbnv</a> . | NA   | <i>Biomphalaria pfeifferi</i> | 48.40343<br>5 | -14.899761 |
| Clinical findings in female genital schistosomiasis in Madagascar                                                                          | 1997 | <i>S. haematobium</i>         | 45.48300<br>2 | -19.615    |
| Ultrasonographical assessment of morbidity in schistosomiasis mansoni in Madagascar: a community-based study in a rural population         | 1993 | <i>S. mansoni</i>             | 45.93299<br>9 | -19.082001 |
| Ultrasonographical assessment of morbidity in schistosomiasis mansoni in Madagascar: a community-based study in a rural population         | 1993 | <i>S. mansoni</i>             | 45.812        | -18.905001 |

|                                                                                                                                                                                                                                                               |      |                |               |            |
|---------------------------------------------------------------------------------------------------------------------------------------------------------------------------------------------------------------------------------------------------------------|------|----------------|---------------|------------|
| Bilan parasitologique d'une population du nord ouest de Madagascar avant travaux d'aménagement hydraulique pour l'extension d'un complexe sucrier (Ambilobe). / Parasitological status of a population of north-western Madagascar before the construction of | 1981 | S. haematobium | 48.84999<br>8 | -13.083    |
| Bilan parasitologique d'une population du nord ouest de Madagascar avant travaux d'aménagement hydraulique pour l'extension d'un complexe sucrier (Ambilobe). / Parasitological status of a population of north-western Madagascar before the construction of | 1981 | S. haematobium | 49.05099<br>9 | -13.194    |
| Bilan parasitologique d'une population du nord ouest de Madagascar avant travaux d'aménagement hydraulique pour l'extension d'un complexe sucrier (Ambilobe). / Parasitological status of a population of north-western Madagascar before the construction of | 1981 | S. haematobium | 48.86600<br>1 | -13.335    |
| Bilan parasitologique d'une population du nord ouest de Madagascar avant travaux d'aménagement hydraulique pour l'extension d'un complexe sucrier (Ambilobe). / Parasitological status of a population of north-western Madagascar before the construction of | 1981 | S. haematobium | 48.88299<br>9 | -13.116    |
| Sexual behavior and sexually transmitted infections in men living in rural Madagascar: implications for HIV transmission                                                                                                                                      | 1998 | S. haematobium | 46.09899<br>9 | -22.365999 |
| Sexual behavior and sexually transmitted infections in men living in rural Madagascar: implications for HIV transmission                                                                                                                                      | 1998 | S. haematobium | 43.6833       | -23.3167   |
| Sero-epidemiological study of intestinal schistosomiasis at Ampefy (Itasy Lake, Madagascar)                                                                                                                                                                   | 1983 | S. mansoni     | 46.73329<br>9 | -19.049999 |
| Study of schistosomiasis in the Lake Aloatra region - the "rice granary" of Madagascar                                                                                                                                                                        | 1982 | S. mansoni     | 48.39899<br>8 | -17.9      |
| Study of schistosomiasis in the Lake Aloatra region - the "rice granary" of Madagascar                                                                                                                                                                        | 1982 | S. mansoni     | 48.49599<br>8 | -17.406    |
| Study of schistosomiasis in the Lake Aloatra region - the "rice granary" of Madagascar                                                                                                                                                                        | 1982 | S. mansoni     | 48.51670<br>1 | -17.616699 |
| Study of schistosomiasis in the Lake Aloatra region - the "rice granary" of Madagascar                                                                                                                                                                        | 1982 | S. mansoni     | 48.5          | -17.632999 |
| Study of schistosomiasis in the Lake Aloatra region - the "rice granary" of Madagascar                                                                                                                                                                        | 1982 | S. mansoni     | 48.43299<br>9 | -17.750999 |
| Study of schistosomiasis in the Lake Aloatra region - the "rice granary" of Madagascar                                                                                                                                                                        | 1982 | S. mansoni     | 48.63330<br>1 | -17.3333   |
| Study of schistosomiasis in the Lake Aloatra region - the "rice granary" of Madagascar                                                                                                                                                                        | 1982 | S. mansoni     | 48.42900<br>1 | -17.514999 |
| Schistosoma mansoni in schoolchildren in a Madagascan highland school assessed by PCR and sedimentation microscopy and Bayesian estimation of sensitivities and specificities                                                                                 | 2012 | S. mansoni     | 47.155        | -20.5235   |
| Schistosoma mansoni in schoolchildren in a Madagascan highland school assessed by PCR and sedimentation microscopy and Bayesian estimation of sensitivities and specificities                                                                                 | 2012 | S. mansoni     | 47.155        | -20.5235   |

|                                                                                                                                           |      |                       |               |            |
|-------------------------------------------------------------------------------------------------------------------------------------------|------|-----------------------|---------------|------------|
| Parasitic co-infections: does <i>Ascaris lumbricoides</i> protect against <i>Plasmodium falciparum</i> infection?                         | 1997 | <i>S. mansoni</i>     | 46.54999<br>9 | -19.383301 |
| Morbidity of schistosomiasis <i>mansoni</i> in the highlands of Madagascar and comparison of current sonographical classification systems | 1994 | <i>S. mansoni</i>     | 46.833        | -20.549    |
| Worms, wells, and water in western Madagascar                                                                                             | 1987 | <i>S. haematobium</i> | 44.632        | -20.282    |
| Lot quality assurance sampling for screening communities hyperendemic for <i>Schistosoma mansoni</i>                                      | 1998 | <i>S. mansoni</i>     | 46.31600<br>2 | -22.233    |
| Lot quality assurance sampling for screening communities hyperendemic for <i>Schistosoma mansoni</i>                                      | 1998 | <i>S. mansoni</i>     | 46.08200<br>1 | -22.333    |
| Lot quality assurance sampling for screening communities hyperendemic for <i>Schistosoma mansoni</i>                                      | 1998 | <i>S. mansoni</i>     | 46.36600<br>1 | -22.049999 |
| Lot quality assurance sampling for screening communities hyperendemic for <i>Schistosoma mansoni</i>                                      | 1998 | <i>S. mansoni</i>     | 45.799        | -22.615999 |
| Lot quality assurance sampling for screening communities hyperendemic for <i>Schistosoma mansoni</i>                                      | 1998 | <i>S. mansoni</i>     | 46.08330<br>2 | -22.35     |
| Lot quality assurance sampling for screening communities hyperendemic for <i>Schistosoma mansoni</i>                                      | 1998 | <i>S. mansoni</i>     | 46.23199<br>8 | -22.316    |
| Lot quality assurance sampling for screening communities hyperendemic for <i>Schistosoma mansoni</i>                                      | 1998 | <i>S. mansoni</i>     | 46.4333       | -23.450001 |
| Lot quality assurance sampling for screening communities hyperendemic for <i>Schistosoma mansoni</i>                                      | 1998 | <i>S. mansoni</i>     | 46.48300<br>2 | -22.6      |
| Lot quality assurance sampling for screening communities hyperendemic for <i>Schistosoma mansoni</i>                                      | 1998 | <i>S. mansoni</i>     | 46.28300<br>1 | -22.499001 |
| Lot quality assurance sampling for screening communities hyperendemic for <i>Schistosoma mansoni</i>                                      | 1998 | <i>S. mansoni</i>     | 46.368        | -22.573    |
| Lot quality assurance sampling for screening communities hyperendemic for <i>Schistosoma mansoni</i>                                      | 1998 | <i>S. mansoni</i>     | 46.11500<br>2 | -22.450001 |
| Lot quality assurance sampling for screening communities hyperendemic for <i>Schistosoma mansoni</i>                                      | 1998 | <i>S. mansoni</i>     | 45.6833       | -22.0833   |
| Lot quality assurance sampling for screening communities hyperendemic for <i>Schistosoma mansoni</i>                                      | 1998 | <i>S. mansoni</i>     | 46.583        | -22.483999 |
| Lot quality assurance sampling for screening communities hyperendemic for <i>Schistosoma mansoni</i>                                      | 1998 | <i>S. mansoni</i>     | 46.368        | -22.211    |
| Lot quality assurance sampling for screening communities hyperendemic for <i>Schistosoma mansoni</i>                                      | 1998 | <i>S. mansoni</i>     | 45.75         | -22.516001 |
| Lot quality assurance sampling for screening communities hyperendemic for <i>Schistosoma mansoni</i>                                      | 1998 | <i>S. mansoni</i>     | 46.166        | -22.35     |
| Lot quality assurance sampling for screening communities hyperendemic for <i>Schistosoma mansoni</i>                                      | 1998 | <i>S. mansoni</i>     | 46.09899<br>9 | -22.431999 |
| Lot quality assurance sampling for screening communities hyperendemic for <i>Schistosoma mansoni</i>                                      | 1998 | <i>S. mansoni</i>     | 46.15000<br>2 | -22.316    |
| Lot quality assurance sampling for screening communities hyperendemic for <i>Schistosoma mansoni</i>                                      | 1998 | <i>S. mansoni</i>     | 46.09899<br>9 | -22.431999 |
| Lot quality assurance sampling for screening communities hyperendemic for <i>Schistosoma mansoni</i>                                      | 1998 | <i>S. mansoni</i>     | 46.15000<br>2 | -22.316    |
| Lot quality assurance sampling for screening communities hyperendemic for <i>Schistosoma mansoni</i>                                      | 1998 | <i>S. mansoni</i>     | 45.75         | -22.516001 |

|                                                                                                                                                                                    |      |                   |               |            |
|------------------------------------------------------------------------------------------------------------------------------------------------------------------------------------|------|-------------------|---------------|------------|
| Lot quality assurance sampling for screening communities hyperendemic for <i>Schistosoma mansoni</i>                                                                               | 1998 | <i>S. mansoni</i> | 46.15000<br>2 | -22.466    |
| Lot quality assurance sampling for screening communities hyperendemic for <i>Schistosoma mansoni</i>                                                                               | 1998 | <i>S. mansoni</i> | 45.99900<br>1 | -22.433001 |
| Lot quality assurance sampling for screening communities hyperendemic for <i>Schistosoma mansoni</i>                                                                               | 1998 | <i>S. mansoni</i> | 46.49900<br>1 | -22.632999 |
| Lot quality assurance sampling for screening communities hyperendemic for <i>Schistosoma mansoni</i>                                                                               | 1998 | <i>S. mansoni</i> | 46.09899<br>9 | -22.367001 |
| Lot quality assurance sampling for screening communities hyperendemic for <i>Schistosoma mansoni</i>                                                                               | 1998 | <i>S. mansoni</i> | 45.99900<br>1 | -22.532    |
| Lot quality assurance sampling for screening communities hyperendemic for <i>Schistosoma mansoni</i>                                                                               | 1998 | <i>S. mansoni</i> | 46.15000<br>2 | -22.466    |
| Lot quality assurance sampling for screening communities hyperendemic for <i>Schistosoma mansoni</i>                                                                               | 1998 | <i>S. mansoni</i> | 46.49900<br>1 | -22.533001 |
| Lot quality assurance sampling for screening communities hyperendemic for <i>Schistosoma mansoni</i>                                                                               | 1998 | <i>S. mansoni</i> | 45.73329<br>9 | -22.6833   |
| Lot quality assurance sampling for screening communities hyperendemic for <i>Schistosoma mansoni</i>                                                                               | 1998 | <i>S. mansoni</i> | 46.11669<br>9 | -22.75     |
| Lot quality assurance sampling for screening communities hyperendemic for <i>Schistosoma mansoni</i>                                                                               | 1998 | <i>S. mansoni</i> | 46.28329<br>8 | -22.483299 |
| Lot quality assurance sampling for screening communities hyperendemic for <i>Schistosoma mansoni</i>                                                                               | 1998 | <i>S. mansoni</i> | 46.09899<br>9 | -22.4      |
| Ultrasonographical assessment of morbidity in <i>Schistosoma mansoni</i> infections in Madagascar according to two classifications: Cairo/WHO and Managil-Hannover staging-systems | 1996 | <i>S. mansoni</i> | 46.73329<br>9 | -19.049999 |
| Ultrasonographical assessment of morbidity in <i>Schistosoma mansoni</i> infections in Madagascar according to two classifications: Cairo/WHO and Managil-Hannover staging-systems | 1996 | <i>S. mansoni</i> | 46.78200<br>2 | -18.85     |
| Potential spread of <i>Schistosoma mansoni</i> in Antananarivo and suburbs according to present epidemiological data                                                               | 1994 | <i>S. mansoni</i> | 47.083        | -19.365999 |
| Potential spread of <i>Schistosoma mansoni</i> in Antananarivo and suburbs according to present epidemiological data                                                               | 1994 | <i>S. mansoni</i> | 47.01599<br>9 | -17.916    |
| Potential spread of <i>Schistosoma mansoni</i> in Antananarivo and suburbs according to present epidemiological data                                                               | 1994 | <i>S. mansoni</i> | 47.5          | -18.931999 |
| Potential spread of <i>Schistosoma mansoni</i> in Antananarivo and suburbs according to present epidemiological data                                                               | 1994 | <i>S. mansoni</i> | 47.5          | -18.931999 |
| Potential spread of <i>Schistosoma mansoni</i> in Antananarivo and suburbs according to present epidemiological data                                                               | 1994 | <i>S. mansoni</i> | 47.56600<br>2 | -18.948    |
| Potential spread of <i>Schistosoma mansoni</i> in Antananarivo and suburbs according to present epidemiological data                                                               | 1994 | <i>S. mansoni</i> | 47.083        | -18.283001 |

|                                                                                                                       |      |                       |               |            |
|-----------------------------------------------------------------------------------------------------------------------|------|-----------------------|---------------|------------|
| Potential spread of <i>Schistosoma mansoni</i> in Antananarivo and suburbs according to present epidemiological data  | 1994 | <i>S. mansoni</i>     | 46.84999<br>8 | -18.8333   |
| Potential spread of <i>Schistosoma mansoni</i> in Antananarivo and suburbs according to present epidemiological data  | 1994 | <i>S. mansoni</i>     | 47.01599<br>9 | -17.916    |
| Potential spread of <i>Schistosoma mansoni</i> in Antananarivo and suburbs according to present epidemiological data  | 1994 | <i>S. mansoni</i>     | 47.5          | -18.716    |
| Potential spread of <i>Schistosoma mansoni</i> in Antananarivo and suburbs according to present epidemiological data  | 1994 | <i>S. mansoni</i>     | 47.53300<br>1 | -18.931999 |
| Potential spread of <i>Schistosoma mansoni</i> in Antananarivo and suburbs according to present epidemiological data  | 1994 | <i>S. mansoni</i>     | 47.53300<br>1 | -18.931999 |
| Potential spread of <i>Schistosoma mansoni</i> in Antananarivo and suburbs according to present epidemiological data  | 1994 | <i>S. mansoni</i>     | 47.5          | -18.899    |
| Potential spread of <i>Schistosoma mansoni</i> in Antananarivo and suburbs according to present epidemiological data  | 1994 | <i>S. haematobium</i> | 46.84999<br>8 | -18.8333   |
| Potential spread of <i>Schistosoma mansoni</i> in Antananarivo and suburbs according to present epidemiological data  | 1994 | <i>S. mansoni</i>     | 46.84999<br>8 | -18.8333   |
| Potential spread of <i>Schistosoma mansoni</i> in Antananarivo and suburbs according to present epidemiological data  | 1994 | <i>S. mansoni</i>     | 47.56600<br>2 | -18.999001 |
| Potential spread of <i>Schistosoma mansoni</i> in Antananarivo and suburbs according to present epidemiological data  | 1994 | <i>S. mansoni</i>     | 47.48300<br>2 | -18.216    |
| Potential spread of <i>Schistosoma mansoni</i> in Antananarivo and suburbs according to present epidemiological data  | 1994 | <i>S. mansoni</i>     | 47.549        | -18.85     |
| Potential spread of <i>Schistosoma mansoni</i> in Antananarivo and suburbs according to present epidemiological data  | 1994 | <i>S. mansoni</i>     | 47.53390<br>1 | -18.8904   |
| Potential spread of <i>Schistosoma mansoni</i> in Antananarivo and suburbs according to present epidemiological data  | 1994 | <i>S. mansoni</i>     | 47.53300<br>1 | -18.833    |
| Reagent strips: their interest for <i>Schistosoma haematobium</i> mass screening in Madagascar                        | 1994 | <i>S. haematobium</i> | 45.48300<br>2 | -19.615    |
| <i>Schistosoma haematobium</i> infection in western Madagascar: morbidity determined by ultrasonography               | 1994 | <i>S. haematobium</i> | 45.48300<br>2 | -19.615    |
| Geographic differences in hepatosplenic complications of schistosomiasis mansoni and explanatory factors of morbidity | 1997 | <i>S. mansoni</i>     | 46.28329<br>8 | -22.483299 |
| Geographic differences in hepatosplenic complications of schistosomiasis mansoni and explanatory factors of morbidity | 1997 | <i>S. mansoni</i>     | 46.368        | -22.211    |

|                                                                                                                             |      |                       |               |            |
|-----------------------------------------------------------------------------------------------------------------------------|------|-----------------------|---------------|------------|
| Geographic differences in hepatosplenic complications of schistosomiasis mansoni and explanatory factors of morbidity       | 1997 | <i>S. mansoni</i>     | 46.36600<br>1 | -22.049999 |
| Identification of communities endemic for urinary bilharziosis by the "Lot Quality Assurance Sampling" method in Madagascar | 2000 | <i>S. haematobium</i> | 46.70000<br>1 | -16.166    |
| Identification of communities endemic for urinary bilharziosis by the "Lot Quality Assurance Sampling" method in Madagascar | 2000 | <i>S. haematobium</i> | 45.59299<br>9 | -20.349001 |
| Identification of communities endemic for urinary bilharziosis by the "Lot Quality Assurance Sampling" method in Madagascar | 2000 | <i>S. haematobium</i> | 45.59299<br>9 | -20.349001 |
| Identification of communities endemic for urinary bilharziosis by the "Lot Quality Assurance Sampling" method in Madagascar | 2000 | <i>S. haematobium</i> | 45.59299<br>9 | -20.349001 |
| Validation of questionnaire methods to identify Schistosoma haematobium bilharziasis hyperendemic zones in Madagascar       | 1999 | <i>S. haematobium</i> | 43.659        | -22.179001 |
| Validation of questionnaire methods to identify Schistosoma haematobium bilharziasis hyperendemic zones in Madagascar       | 1999 | <i>S. haematobium</i> | 44.53599<br>9 | -24.813    |
| Validation of questionnaire methods to identify Schistosoma haematobium bilharziasis hyperendemic zones in Madagascar       | 1999 | <i>S. haematobium</i> | 44.81600<br>2 | -23.716    |
| Validation of questionnaire methods to identify Schistosoma haematobium bilharziasis hyperendemic zones in Madagascar       | 1999 | <i>S. haematobium</i> | 44.81600<br>2 | -24.499001 |
| Validation of questionnaire methods to identify Schistosoma haematobium bilharziasis hyperendemic zones in Madagascar       | 1999 | <i>S. haematobium</i> | 45.16500<br>1 | -25.183001 |
| Validation of questionnaire methods to identify Schistosoma haematobium bilharziasis hyperendemic zones in Madagascar       | 1999 | <i>S. haematobium</i> | 44.74499<br>9 | -24.698999 |
| Validation of questionnaire methods to identify Schistosoma haematobium bilharziasis hyperendemic zones in Madagascar       | 1999 | <i>S. haematobium</i> | 44.40000<br>2 | -20.1667   |
| Validation of questionnaire methods to identify Schistosoma haematobium bilharziasis hyperendemic zones in Madagascar       | 1999 | <i>S. haematobium</i> | 44.4333       | -20.1833   |
| Validation of questionnaire methods to identify Schistosoma haematobium bilharziasis hyperendemic zones in Madagascar       | 1999 | <i>S. haematobium</i> | 44.76499<br>9 | -24.65     |
| Validation of questionnaire methods to identify Schistosoma haematobium bilharziasis hyperendemic zones in Madagascar       | 1999 | <i>S. haematobium</i> | 43.61669<br>9 | -22.25     |
| Validation of questionnaire methods to identify Schistosoma haematobium bilharziasis hyperendemic zones in Madagascar       | 1999 | <i>S. haematobium</i> | 44.0667       | -23.733299 |

|                                                                                                                              |      |                       |                |            |
|------------------------------------------------------------------------------------------------------------------------------|------|-----------------------|----------------|------------|
| Validation of questionnaire methods to identify <i>Schistosoma haematobium</i> bilharziasis hyperendemic zones in Madagascar | 1999 | <i>S. haematobium</i> | 43.681999<br>9 | -22.282    |
| Validation of questionnaire methods to identify <i>Schistosoma haematobium</i> bilharziasis hyperendemic zones in Madagascar | 1999 | <i>S. haematobium</i> | 43.83330<br>2  | -22.1667   |
| WHO. Atlas of the Global Distribution of Schistosomiasis - Madagascar - Mauritius. (1987)                                    | 1956 | <i>S. mansoni</i>     | 49.39667<br>8  | -18.16201  |
| WHO. Atlas of the Global Distribution of Schistosomiasis - Madagascar - Mauritius. (1987)                                    | 1971 | <i>S. haematobium</i> | 46.3261        | -15.705726 |
| WHO. Atlas of the Global Distribution of Schistosomiasis - Madagascar - Mauritius. (1987)                                    | 1956 | <i>S. haematobium</i> | 46.69222<br>9  | -15.481616 |
| WHO. Atlas of the Global Distribution of Schistosomiasis - Madagascar - Mauritius. (1987)                                    | 1956 | <i>S. haematobium</i> | 46.24069<br>2  | -15.762139 |
| WHO. Atlas of the Global Distribution of Schistosomiasis - Madagascar - Mauritius. (1987)                                    | 1956 | <i>S. haematobium</i> | 44.86761<br>6  | -16.348874 |
| WHO. Atlas of the Global Distribution of Schistosomiasis - Madagascar - Mauritius. (1987)                                    | 1956 | <i>S. haematobium</i> | 44.48581<br>3  | -16.743123 |
| WHO. Atlas of the Global Distribution of Schistosomiasis - Madagascar - Mauritius. (1987)                                    | 1956 | <i>S. haematobium</i> | 45.10344<br>5  | -16.971656 |
| WHO. Atlas of the Global Distribution of Schistosomiasis - Madagascar - Mauritius. (1987)                                    | 1956 | <i>S. haematobium</i> | 43.95664       | -17.51135  |
| WHO. Atlas of the Global Distribution of Schistosomiasis - Madagascar - Mauritius. (1987)                                    | 1957 | <i>S. haematobium</i> | 44.03084<br>5  | -18.056023 |
| WHO. Atlas of the Global Distribution of Schistosomiasis - Madagascar - Mauritius. (1987)                                    | 1956 | <i>S. haematobium</i> | 44.31612<br>6  | -18.566662 |
| WHO. Atlas of the Global Distribution of Schistosomiasis - Madagascar - Mauritius. (1987)                                    | 1956 | <i>S. haematobium</i> | 44.34268<br>6  | -19.026085 |
| WHO. Atlas of the Global Distribution of Schistosomiasis - Madagascar - Mauritius. (1987)                                    | 1956 | <i>S. haematobium</i> | 44.92772<br>4  | -17.821386 |
| WHO. Atlas of the Global Distribution of Schistosomiasis - Madagascar - Mauritius. (1987)                                    | 1957 | <i>S. haematobium</i> | 45.25602<br>3  | -18.546364 |
| WHO. Atlas of the Global Distribution of Schistosomiasis - Madagascar - Mauritius. (1987)                                    | 1952 | <i>S. haematobium</i> | 44.62393       | -18.673742 |
| WHO. Atlas of the Global Distribution of Schistosomiasis - Madagascar - Mauritius. (1987)                                    | 1973 | <i>S. haematobium</i> | 44.54296       | -19.699319 |
| WHO. Atlas of the Global Distribution of Schistosomiasis - Madagascar - Mauritius. (1987)                                    | 1956 | <i>S. haematobium</i> | 44.68878<br>1  | -19.705983 |
| WHO. Atlas of the Global Distribution of Schistosomiasis - Madagascar - Mauritius. (1987)                                    | 1950 | <i>S. haematobium</i> | 44.96328<br>2  | -19.72856  |
| WHO. Atlas of the Global Distribution of Schistosomiasis - Madagascar - Mauritius. (1987)                                    | 1956 | <i>S. haematobium</i> | 44.50377<br>4  | -20.328885 |
| WHO. Atlas of the Global Distribution of Schistosomiasis - Madagascar - Mauritius. (1987)                                    | 1961 | <i>S. haematobium</i> | 44.36060<br>3  | -20.577678 |
| WHO. Atlas of the Global Distribution of Schistosomiasis - Madagascar - Mauritius. (1987)                                    | 1956 | <i>S. haematobium</i> | 45.05279<br>2  | -20.411643 |
| WHO. Atlas of the Global Distribution of Schistosomiasis - Madagascar - Mauritius. (1987)                                    | 1956 | <i>S. haematobium</i> | 44.92903<br>6  | -21.051182 |
| WHO. Atlas of the Global Distribution of Schistosomiasis - Madagascar - Mauritius. (1987)                                    | 1952 | <i>S. haematobium</i> | 43.60127<br>4  | -21.322382 |



|                                                                                           |      |                |                        |            |
|-------------------------------------------------------------------------------------------|------|----------------|------------------------|------------|
| WHO. Atlas of the Global Distribution of Schistosomiasis - Madagascar - Mauritius. (1987) | 1957 | S. haematobium | 43.88936<br>4          | -21.714482 |
| WHO. Atlas of the Global Distribution of Schistosomiasis - Madagascar - Mauritius. (1987) | 1956 | S. haematobium | 45.06501<br>4          | -22.172659 |
| WHO. Atlas of the Global Distribution of Schistosomiasis - Madagascar - Mauritius. (1987) | 1957 | S. haematobium | 43.76105<br>6          | -23.547822 |
| WHO. Atlas of the Global Distribution of Schistosomiasis - Madagascar - Mauritius. (1987) | 1950 | S. haematobium | 44.68199<br>9          | -22.650675 |
| WHO. Atlas of the Global Distribution of Schistosomiasis - Madagascar - Mauritius. (1987) | 1951 | S. haematobium | 48.08403<br>9          | -14.204835 |
| WHO. Atlas of the Global Distribution of Schistosomiasis - Madagascar - Mauritius. (1987) | 1973 | S. haematobium | 49.64809<br>-14.655774 |            |
| WHO. Atlas of the Global Distribution of Schistosomiasis - Madagascar - Mauritius. (1987) | 1965 | S. haematobium | 49.94736<br>4          | -13.860145 |
| WHO. Atlas of the Global Distribution of Schistosomiasis - Madagascar - Mauritius. (1987) | 1965 | S. haematobium | 49.66129<br>9          | -13.20527  |
| WHO. Atlas of the Global Distribution of Schistosomiasis - Madagascar - Mauritius. (1987) | 1976 | S. haematobium | 49.23443<br>3          | -13.156635 |
| WHO. Atlas of the Global Distribution of Schistosomiasis - Madagascar - Mauritius. (1987) | 1955 | S. haematobium | 49.01558<br>7          | -13.047098 |
| WHO. Atlas of the Global Distribution of Schistosomiasis - Madagascar - Mauritius. (1987) | 1958 | S. haematobium | 48.27459<br>6          | -13.39859  |
| WHO. Atlas of the Global Distribution of Schistosomiasis - Madagascar - Mauritius. (1987) | 1950 | S. haematobium | 47.39557<br>6          | -15.121899 |
| WHO. Atlas of the Global Distribution of Schistosomiasis - Madagascar - Mauritius. (1987) | 1952 | S. haematobium | 47.73895<br>6          | -14.605437 |
| WHO. Atlas of the Global Distribution of Schistosomiasis - Madagascar - Mauritius. (1987) | 1965 | S. haematobium | 47.71141<br>4          | -14.405327 |
| WHO. Atlas of the Global Distribution of Schistosomiasis - Madagascar - Mauritius. (1987) | 1976 | S. haematobium | 48.82315<br>7          | -13.550206 |
| WHO. Atlas of the Global Distribution of Schistosomiasis - Madagascar - Mauritius. (1987) | 1956 | S. haematobium | 48.75048<br>8          | -14.542363 |
| WHO. Atlas of the Global Distribution of Schistosomiasis - Madagascar - Mauritius. (1987) | 1957 | S. haematobium | 48.54612<br>-15.041382 |            |
| WHO. Atlas of the Global Distribution of Schistosomiasis - Madagascar - Mauritius. (1987) | 1956 | S. haematobium | 48.53577<br>4          | -15.741076 |
| WHO. Atlas of the Global Distribution of Schistosomiasis - Madagascar - Mauritius. (1987) | 1956 | S. haematobium | 47.73528<br>3          | -15.934238 |
| WHO. Atlas of the Global Distribution of Schistosomiasis - Madagascar - Mauritius. (1987) | 1958 | S. haematobium | 47.99281<br>2          | -14.882714 |
| WHO. Atlas of the Global Distribution of Schistosomiasis - Madagascar - Mauritius. (1987) | 1956 | S. haematobium | 47.91856<br>2          | -15.544481 |
| WHO. Atlas of the Global Distribution of Schistosomiasis - Madagascar - Mauritius. (1987) | 1956 | S. haematobium | 46.95688<br>8          | -17.305317 |
| WHO. Atlas of the Global Distribution of Schistosomiasis - Madagascar - Mauritius. (1987) | 1956 | S. haematobium | 47.65102<br>2          | -16.797774 |
| WHO. Atlas of the Global Distribution of Schistosomiasis - Madagascar - Mauritius. (1987) | 1954 | S. mansoni     | 49.45466<br>7          | -17.489337 |
| WHO. Atlas of the Global Distribution of Schistosomiasis - Madagascar - Mauritius. (1987) | 1957 | S. mansoni     | 49.13917<br>5          | -17.432439 |

|                                                                                           |      |                   |           |            |
|-------------------------------------------------------------------------------------------|------|-------------------|-----------|------------|
| WHO. Atlas of the Global Distribution of Schistosomiasis - Madagascar - Mauritius. (1987) | 1956 | <i>S. mansoni</i> | 46.812301 | -25.027343 |
| WHO. Atlas of the Global Distribution of Schistosomiasis - Madagascar - Mauritius. (1987) | 1955 | <i>S. mansoni</i> | 46.687384 | -25.05382  |
| WHO. Atlas of the Global Distribution of Schistosomiasis - Madagascar - Mauritius. (1987) | 1955 | <i>S. mansoni</i> | 46.965085 | -24.569246 |
| WHO. Atlas of the Global Distribution of Schistosomiasis - Madagascar - Mauritius. (1987) | 1955 | <i>S. mansoni</i> | 47.547207 | -23.798909 |
| WHO. Atlas of the Global Distribution of Schistosomiasis - Madagascar - Mauritius. (1987) | 1954 | <i>S. mansoni</i> | 46.971859 | -24.020175 |
| WHO. Atlas of the Global Distribution of Schistosomiasis - Madagascar - Mauritius. (1987) | 1971 | <i>S. mansoni</i> | 47.597946 | -23.339606 |
| WHO. Atlas of the Global Distribution of Schistosomiasis - Madagascar - Mauritius. (1987) | 1955 | <i>S. mansoni</i> | 45.061314 | -25.174255 |
| WHO. Atlas of the Global Distribution of Schistosomiasis - Madagascar - Mauritius. (1987) | 1950 | <i>S. mansoni</i> | 46.079448 | -24.072031 |
| WHO. Atlas of the Global Distribution of Schistosomiasis - Madagascar - Mauritius. (1987) | 1955 | <i>S. mansoni</i> | 46.476443 | -24.604196 |
| WHO. Atlas of the Global Distribution of Schistosomiasis - Madagascar - Mauritius. (1987) | 1955 | <i>S. mansoni</i> | 45.595353 | -24.673199 |
| WHO. Atlas of the Global Distribution of Schistosomiasis - Madagascar - Mauritius. (1987) | 1955 | <i>S. mansoni</i> | 45.302332 | -24.558602 |
| WHO. Atlas of the Global Distribution of Schistosomiasis - Madagascar - Mauritius. (1987) | 1975 | <i>S. mansoni</i> | 44.362292 | -23.818446 |
| WHO. Atlas of the Global Distribution of Schistosomiasis - Madagascar - Mauritius. (1987) | 1955 | <i>S. mansoni</i> | 46.091328 | -25.17356  |
| WHO. Atlas of the Global Distribution of Schistosomiasis - Madagascar - Mauritius. (1987) | 1953 | <i>S. mansoni</i> | 45.012415 | -23.545244 |
| WHO. Atlas of the Global Distribution of Schistosomiasis - Madagascar - Mauritius. (1987) | 1968 | <i>S. mansoni</i> | 49.001243 | -18.470049 |
| WHO. Atlas of the Global Distribution of Schistosomiasis - Madagascar - Mauritius. (1987) | 1961 | <i>S. mansoni</i> | 48.976676 | -19.330777 |
| WHO. Atlas of the Global Distribution of Schistosomiasis - Madagascar - Mauritius. (1987) | 1961 | <i>S. mansoni</i> | 48.80693  | -19.893801 |
| WHO. Atlas of the Global Distribution of Schistosomiasis - Madagascar - Mauritius. (1987) | 1959 | <i>S. mansoni</i> | 49.415774 | -17.660979 |
| WHO. Atlas of the Global Distribution of Schistosomiasis - Madagascar - Mauritius. (1987) | 1957 | <i>S. mansoni</i> | 47.034079 | -22.500241 |
| WHO. Atlas of the Global Distribution of Schistosomiasis - Madagascar - Mauritius. (1987) | 1954 | <i>S. mansoni</i> | 48.147637 | -21.229374 |
| WHO. Atlas of the Global Distribution of Schistosomiasis - Madagascar - Mauritius. (1987) | 1954 | <i>S. mansoni</i> | 48.345482 | -21.23837  |
| WHO. Atlas of the Global Distribution of Schistosomiasis - Madagascar - Mauritius. (1987) | 1953 | <i>S. mansoni</i> | 48.479514 | -20.773606 |
| WHO. Atlas of the Global Distribution of Schistosomiasis - Madagascar - Mauritius. (1987) | 1957 | <i>S. mansoni</i> | 48.600427 | -18.900622 |
| WHO. Atlas of the Global Distribution of Schistosomiasis - Madagascar - Mauritius. (1987) | 1951 | <i>S. mansoni</i> | 47.400828 | -20.307152 |
| WHO. Atlas of the Global Distribution of Schistosomiasis - Madagascar - Mauritius. (1987) | 1935 | <i>S. mansoni</i> | 48.322593 | -20.597505 |

|                                                                                                                                                                                                                |      |                   |           |            |
|----------------------------------------------------------------------------------------------------------------------------------------------------------------------------------------------------------------|------|-------------------|-----------|------------|
| WHO. Atlas of the Global Distribution of Schistosomiasis - Madagascar - Mauritius. (1987)                                                                                                                      | 1955 | <i>S. mansoni</i> | 47.041834 | -21.556506 |
| WHO. Atlas of the Global Distribution of Schistosomiasis - Madagascar - Mauritius. (1987)                                                                                                                      | 1955 | <i>S. mansoni</i> | 44.635148 | -22.090054 |
| WHO. Atlas of the Global Distribution of Schistosomiasis - Madagascar - Mauritius. (1987)                                                                                                                      | 1955 | <i>S. mansoni</i> | 44.857337 | -21.37432  |
| WHO. Atlas of the Global Distribution of Schistosomiasis - Madagascar - Mauritius. (1987)                                                                                                                      | 1955 | <i>S. mansoni</i> | 45.954758 | -20.532126 |
| WHO. Atlas of the Global Distribution of Schistosomiasis - Madagascar - Mauritius. (1987)                                                                                                                      | 1956 | <i>S. mansoni</i> | 47.553352 | -17.034229 |
| WHO. Atlas of the Global Distribution of Schistosomiasis - Madagascar - Mauritius. (1987)                                                                                                                      | 1957 | <i>S. mansoni</i> | 48.802676 | -19.57594  |
| WHO. Atlas of the Global Distribution of Schistosomiasis - Madagascar - Mauritius. (1987)                                                                                                                      | 1956 | <i>S. mansoni</i> | 46.914577 | -20.380735 |
| High burden of Schistosoma mansoni infection in school-aged children in Marolambo District, Madagascar                                                                                                         | 2017 | Human Case        | 48.099899 | -20.116435 |
| High burden of Schistosoma mansoni infection in school-aged children in Marolambo District, Madagascar                                                                                                         | 2017 | Human Case        | 47.940974 | -20.578717 |
| Serology- and Blood-PCR-Based Screening for Schistosomiasis in Pregnant Women in Madagascar—A Cross-Sectional Study and Test Comparison Approach                                                               | 2021 | Human Case        | 46.049136 | -18.76977  |
| Sawyer, S. G. (2013). Schistosomiasis (Bilharzia) in Madagascar: A Case Study of a Neglected Tropical Disease.                                                                                                 | 2013 | Human Case        | 44.279857 | -20.294073 |
| Usefulness of environmental DNA for detecting Schistosoma mansoni occurrence sites in Madagascar                                                                                                               | 2018 | Human Case        | 46.964915 | -17.453877 |
| Clinical findings in female genital schistosomiasis in Madagascar                                                                                                                                              | 1998 | Human Case        | 44.459261 | -21.70056  |
| Semen quality in Schistosoma haematobium infected men in Madagascar                                                                                                                                            | 2009 | Human Case        | 48.928219 | -13.090937 |
| The first cases of bovine schistosomiasis in Madagascar                                                                                                                                                        | 1972 | Animal Case       | 47.103564 | -21.452462 |
| Gynecological Manifestations, Histopathological Findings, and Schistosoma-Specific Polymerase Chain Reaction Results Among Women with Schistosoma haematobium Infection: A Cross-sectional Study in Madagascar | 2015 | Human Case        | 45.456016 | -19.529578 |
| Sexual Behavior and Sexually Transmitted Infections in Men Living in Rural Madagascar                                                                                                                          | 2003 | Human Case        | 47.035557 | -19.847871 |
| Sexual Behavior and Sexually Transmitted Infections in Men Living in Rural Madagascar                                                                                                                          | 2003 | Human Case        | 46.09153  | -22.374414 |
| An Isolated Focus of Intestinal Schistosomiasis in Madagascar.                                                                                                                                                 | 1952 | Human Case        | 48.835307 | -15.850427 |
| An Isolated Focus of Intestinal Schistosomiasis in Madagascar.                                                                                                                                                 | 1952 | Human Case        | 47.198984 | -19.415002 |
| WHO. Atlas of the Global Distribution of Schistosomiasis - Madagascar - Mauritius. (1987)                                                                                                                      | 1971 | <i>S. mansoni</i> | 47.527049 | -23.267175 |
| WHO. Atlas of the Global Distribution of Schistosomiasis - Madagascar - Mauritius. (1987)                                                                                                                      | 1953 | <i>S. mansoni</i> | 47.317439 | -23.482813 |

|                                                                                           |      |                       |               |            |
|-------------------------------------------------------------------------------------------|------|-----------------------|---------------|------------|
| WHO. Atlas of the Global Distribution of Schistosomiasis - Madagascar - Mauritius. (1987) | 1957 | <i>S. mansoni</i>     | 46.95795<br>6 | -22.711437 |
| WHO. Atlas of the Global Distribution of Schistosomiasis - Madagascar - Mauritius. (1987) | 1953 | <i>S. mansoni</i>     | 47.29477<br>2 | -22.657318 |
| WHO. Atlas of the Global Distribution of Schistosomiasis - Madagascar - Mauritius. (1987) | 1955 | <i>S. mansoni</i>     | 47.58935<br>1 | -22.536765 |
| WHO. Atlas of the Global Distribution of Schistosomiasis - Madagascar - Mauritius. (1987) | 1953 | <i>S. mansoni</i>     | 47.47583<br>2 | -22.189739 |
| WHO. Atlas of the Global Distribution of Schistosomiasis - Madagascar - Mauritius. (1987) | 1954 | <i>S. mansoni</i>     | 47.82823<br>8 | -22.364933 |
| WHO. Atlas of the Global Distribution of Schistosomiasis - Madagascar - Mauritius. (1987) | 1955 | <i>S. mansoni</i>     | 47.72136      | -22.101609 |
| WHO. Atlas of the Global Distribution of Schistosomiasis - Madagascar - Mauritius. (1987) | 1957 | <i>S. mansoni</i>     | 47.89467<br>8 | -21.597646 |
| WHO. Atlas of the Global Distribution of Schistosomiasis - Madagascar - Mauritius. (1987) | 1955 | <i>S. mansoni</i>     | 47.73184      | -20.988238 |
| WHO. Atlas of the Global Distribution of Schistosomiasis - Madagascar - Mauritius. (1987) | 1935 | <i>S. mansoni</i>     | 48.18157<br>9 | -20.510791 |
| WHO. Atlas of the Global Distribution of Schistosomiasis - Madagascar - Mauritius. (1987) | 1959 | <i>S. mansoni</i>     | 47.56558      | -20.678543 |
| WHO. Atlas of the Global Distribution of Schistosomiasis - Madagascar - Mauritius. (1987) | 1961 | <i>S. mansoni</i>     | 48.78155<br>1 | -19.65841  |
| WHO. Atlas of the Global Distribution of Schistosomiasis - Madagascar - Mauritius. (1987) | 1959 | <i>S. mansoni</i>     | 48.83658      | -18.537703 |
| WHO. Atlas of the Global Distribution of Schistosomiasis - Madagascar - Mauritius. (1987) | 1959 | <i>S. mansoni</i>     | 48.47032<br>1 | -20.058293 |
| WHO. Atlas of the Global Distribution of Schistosomiasis - Madagascar - Mauritius. (1987) | 1956 | <i>S. haematobium</i> | 48.83704<br>7 | -16.171871 |
| WHO. Atlas of the Global Distribution of Schistosomiasis - Madagascar - Mauritius. (1987) | 1956 | <i>S. haematobium</i> | 47.73042<br>5 | -17.63386  |
| WHO. Atlas of the Global Distribution of Schistosomiasis - Madagascar - Mauritius. (1987) | 1957 | <i>S. haematobium</i> | 46.54143<br>1 | -16.439454 |
| WHO. Atlas of the Global Distribution of Schistosomiasis - Madagascar - Mauritius. (1987) | 1956 | <i>S. haematobium</i> | 45.85663<br>5 | -16.016655 |
| WHO. Atlas of the Global Distribution of Schistosomiasis - Madagascar - Mauritius. (1987) | 1951 | <i>S. haematobium</i> | 50.14286<br>7 | -15.009571 |
| WHO. Atlas of the Global Distribution of Schistosomiasis - Madagascar - Mauritius. (1987) | 1951 | <i>S. haematobium</i> | 47.87207<br>9 | -14.964814 |
| WHO. Atlas of the Global Distribution of Schistosomiasis - Madagascar - Mauritius. (1987) | 1956 | <i>S. haematobium</i> | 45.56528<br>5 | -16.580413 |
| WHO. Atlas of the Global Distribution of Schistosomiasis - Madagascar - Mauritius. (1987) | 1956 | <i>S. haematobium</i> | 46.12064<br>6 | -16.257579 |
| WHO. Atlas of the Global Distribution of Schistosomiasis - Madagascar - Mauritius. (1987) | 1959 | <i>S. mansoni</i>     | 44.79016<br>3 | -23.880787 |
